# Supplementary material for: A miR172 target-deficient AP2-like gene correlates with the double flower phenotype in roses
Source: PubMed Central journal article supplement (PMC6110776; doi:10.1038/s41598-018-30918-4), 2018-08-27
Supplement: 41598_2018_30918_MOESM1_ESM.pdf [file 41598_2018_30918_MOESM1_ESM.pdf]

## Supplementary Information

### **A miR172 target-deficient AP2-like gene correlates with the double flower phenotype in roses**

Léa FRANÇOIS<sup>1</sup>, Marion VERDENAUD<sup>1,2</sup>, Xiaopeng FU<sup>1,3</sup>, Darcy RULEMAN<sup>1</sup>, Annick DUBOIS<sup>1</sup>, Michiel VANDENBUSSCHE<sup>1</sup>, Abdelhafid BENDAHMANE<sup>2</sup>, Olivier RAYMOND<sup>1</sup>, Jérémy JUST<sup>1</sup>, Mohammed BENDAHMANE<sup>1\*</sup>

<sup>1</sup>Laboratoire Reproduction et Développement des Plantes, Univ Lyon, ENS de Lyon, UCB Lyon 1, CNRS, INRA, F-69364 Lyon, France.

<sup>2</sup>Institute of Plant Sciences Paris-Saclay IPS2, CNRS, INRA, University Paris-Sud, University of Evry, University Paris- Diderot, Sorbonne Paris-Cite, University of Paris-Saclay, F-91405 Orsay, France.

<sup>3</sup>Key Lab of Horticultural Plant Biology, College of Horticulture & Forestry Sciences, Huazhong Agricultural University, Wuhan, China.

\*Corresponding author: Mohammed BENDAHMANE,  
E-mail: [mohammed.bendahmane@ens-lyon](mailto:mohammed.bendahmane@ens-lyon)



**Supplementary Table 2. Rose cultivars used in this study.**

| Phenotype           | Rose species/variety                     | Code |
|---------------------|------------------------------------------|------|
| Simple flower roses | <i>R. wichurana</i>                      | WIC  |
|                     | <i>R. gigantea</i>                       | GIG  |
|                     | <i>R. chinensis</i> 'Spontanea'          | SPO  |
|                     | <i>R. chinensis</i> 'Sanguinea'          | SAN  |
|                     | <i>R. chinensis</i> 'Mutabilis'          | MUT  |
|                     | <i>R. moschata</i>                       | MOS  |
| Double Flower roses | <i>R. chinensis</i> 'Old Blush'          | OB   |
|                     | <i>R. x hybrida</i> 'Rouge Meilland'     | RME  |
|                     | <i>R. x hybrida</i> 'La France'          | FRA  |
|                     | <i>R. odorata</i> 'Hume's Blush'         | HUM  |
|                     | <i>R. x hybrida</i> 'Bébé Fleuri'        | BFL  |
|                     | <i>R. x hybrida</i> 'Bengale d'Automne'  | BENG |
|                     | <i>R. x hybrida</i> 'Cramoisi Supérieur' | CRAM |
|                     | <i>R. x hybrida</i> 'Comtesse de Cayla'  | COMT |
|                     | <i>R. x hybrida</i> 'Ducher'             | DUS  |
|                     | <i>R. x hybrida</i> 'General Shablikine' | GEN  |
|                     | <i>R. x hybrida</i> 'Blush Noisette'     | NOIS |
|                     | <i>R. x hybrida</i> 'Hérodiane'          | HERO |
|                     | <i>R. x hybrida</i> 'Louise d'Arzens'    | LOUI |

**Supplementary Table 3.** Primers used in this study.

|                         |                          |                           |
|-------------------------|--------------------------|---------------------------|
| Genotyping primers      | RcAP2L_TE_left_border_F  | GTGGTGAGAAGTAGTTCCTAGCTAG |
|                         | RcAP2L_TE_left_border_R  | AGACCAAATAGTAGATCCTCACACG |
|                         | RcAP2L_TE_right_border_F | GAAGCTGCAAGGTCTTTACGTTAAT |
|                         | RcAP2L_TE_right_border_R | GAGACTCTTCCACTTTGTTTCCTTG |
|                         | RcAP2Lwt_F               | ATTGCTATGTCATGTCTTCACAACC |
|                         | RcAP2Lwt_R               | TATGGATGGGAAAGAAGTTGGAGTT |
| cDNA sequencing primers | RcAP2L_F                 | CACCATGCTAGATCTCAACCTCAA  |
|                         | RcAP2L $\Delta$ 172_R    | TTATTTGCTTCGGAAAACCC      |
|                         | RcAP2Lwt_R               | TCAGCTCCTGCAATAGAAAT      |

## Supplementary Data File 1

>At-SMZ

VKKSRRGPRSRSSQYRGVTFYRRTGRWESHIWDCGKQVYLGGFDTAYAAARAYDRAAIKF  
RGLDADIN FVDDYRHDIDKMKNLNKVEFVQTLRRESASFGRGSSKYKGLALQKCTQFKT  
HDQIHLFQNRGWDAAAIKYNELGKGEAMKFGAHIKGNHNDLELSLGI

>Carubv10018526m

VKKSRRGPRSRSSQYRGVTFYRRTGRWESHIWDCGKQVYLGGFDTAYAAARAYDRAAIKF  
RGLDADIN FVDDYRHDIDKMKNLNKVEFVQTLRRESASFGRGSSKYKGLALQKCTQFKT  
HHDQIHLFQNRGWDAALKYNELGKGEAMKFGAHIK

>At-SNZ

KKKSRRGPRSRSSSHYRGVTFYRRTGRWESHIWDCGKQVYLGGFDTAYTAARAYDRAAIRF  
RGLQADIN FIVDDYKQDIEKMKNLSKEEFVQSLRRASASLARGGSKYKNTHMRNDHIHLF  
QNRGLNAAAACNEIRKMEGDIKLGAKSKGNEHNDLELSLGI

>Carubv10023614m

KKKSRRGPRSRSSSNYRGVTFYRRTGRWESHIWDCGKQVYLGGFDTAYTAARAYDRAAIKF  
RGLQADIN FIVDDYKQDFEKMKNLSKEEFVQSLRRASASLARGGSKYKNNYMKNDYIHLF  
QNRQWNASAAACNEIRKIEAGEIKLGAHHNKGNEHKDLDLNLSLGI

>At-TOE2

VKKSRRGPRSKSSQYRGVTFYRRTGRWESHIWDCGKQVYLGGFDTAHAARAYDRAAVKF  
RGLADIN FVIGDYEDLKQMANLSKEEVVQVLRQSSGFSRNNRYQGVALQKIGGWA  
QMEQLHGNMGCDKAAVQWKGREASLIEPHASRMIPEAANVKLDLNLGI

>Carubv10026292m

VKKSRRGPRSKSSQYRGVTFYRRTGRWESHIWDCGKQVYLGGFDTAHAARAYDRAAVKF  
RGLADIN FVIGDYEDLKQMANLSKEEVVQVLRQSSGFSRNNRYQGVALQKIGGWA  
QMEQFHGNMACDKAAIQWNGRQAASFIEPHGSRMIPEAANVKLDLNLGI

>Medtr1g049140.1

VRKNRRGPRSRSSQYRGVTFYRRTGRWESHIWDCGKQVYLGGFDTAHAARAYDRAAVMF  
RGVDADIN FNLSDYEDLKQMRGLSKEEFVLRRLRRKTNENSKRSSTYRRTLNLNKYQGDP  
QIITPFVAKEFCHKSPIKRDEHETSCKPSSIYKGEIVANSNKTGTLHNLDSLGI

>Prupe.2G220100.1.p

PRKSRRGPRSRSSQYRGVTFYRRTGRWESHIWDCGKQVYLGGFDTAHSAAARAYDRAAIKF  
RGVDADIN FTLDYEDMKQLGHLNKKEEFVHVLRRQSTGASRGN SKYRGVALPKCGGAGG  
RWEARMAQFPEKKVFEKEGIKYNTGREAAAVTNFVDPSSIYEGEVVLDA SIEGSGHNLDSL  
LGI

>RcHm1g0364341

ARKSRRGPRSRSSQYRGVTFYRRTGRWESHIWDCGKQVYLGGFDTAHSAAKAYDRAAIKF  
RGVDADIN FVLSDYEDLKQMRHLNKKEEFVHVLRRQSN GASRGN SKLRGVAAAAAAAV  
PKIGPFVVRMQLIPGNKLIKNGREGVANFDPSIYEGAVVVDASTEGSGHNLDSLGI

>Fv-gene23252-v1.0-ab\_initio

ARKSRRGPRSRSSQYRGVTFYRRTGRWESHIWDCGKQVYLGGFDTAHSAAKAYDRAAIKF  
RGVDADIN FVLSDYEDLKQMRHLNKKEEFVHVLRRQSN GASRGN SKFRGVAAAAATAAM  
PKIGPFVHMQQLIPGNKLIKNGREGLSNFDPSSIYEGEVVVGASTEGSGHNLDSLGI

>Peaxi162Scf01024g00326.1

AKKSRRGPRSRSSQYRGVTFYRRTGRWESHIWDCGKQVYLGGFDTAHAARAYDRAAIKF  
RGVDADIN FSITDYEDMKQMKNLSKEEFVQILRRQSTGF SRGN SKFRGVTLQKCRWEG  
RMGQFLGKKDYDKAAITCNGREAI SNFQPN TYGREIKEDNKDGGSGENLDLNLWI

>Solyc04g049800.2.1

HKKSRRGPRSRSSQYRGVTFYRRTGRWESHIWDCGKQVYLGGFDTAHAARAYDRAAIKF  
RGVDADIN FNITDYEDMKQMKNLSKEEFVQVLRH SNGFSRGN SKYRGVTLHKCRWEG  
QFIGKKAYDKCDGREAVTNFVASTYEREKKEDKRDGGSGENLDLNLWI

>GSVIVT01016352001

RRGPRSRSSQYRGVTFYRRTGRWESHIWDCGKQVYLGGFDTAHAARAYDRAAIKFRGVD  
ADIN FSISDYEDMKQMKNLSKEEFVHILRRQSN GF SRGN SKYRGVTLHKCRWEARMGQ  
FLGKKYIYLGLDFSEIEAARAYDKAAIRYNGREAVTNFVPSTYEGEAIL EANDRSSGHNL  
DLNLGL

>Peaxi162Scf00072g00229.1\*

VKKSRRGPRSRSSQYRGVTFYRRTGRWESHIWDCGKQVYLGGFDTADVAARAYDRAAIK

FRGVDADINFSITDYEEDMKQLKHLGKEEFVHVLRRQSNNGFSRGSSKFRGVTLHKCGRWE  
ARMGQFLGKKYIYLGLFDSEVEAARAYDKAAIKTNGREAVTNFEPSSAYEGETISEPQSEG  
SHHNLDLNLGI

>S1-AP2e

VKKSRRGPRSRSSQYRGVTFYRRTGRWESH IWDCGKQVYLGGFDTAHTAARAYDRAAIKF  
RGVDADINFSLSDYEDMQMKNLGKEEFVHLLRRHSTGFSRGSSKFRGVTLHKCGRWEA  
RMGQFLGKKYIYLGLFDSEVEAARAYDKAAIKTSGREAVTNFEPSSYEGETMSLPQSEGS  
QHDLDLNLGI

>Peaxi162Scf00389g00028.1\*

VKKSRRGPRSRSSQYRGVTFYRRTGRWESH IWDCGKQVYLGGFDTAHTAARAYDRAAIKF  
RGVDADINFNLSYEDDMKQMKNLKKEEFVHMLRRQSTGFSRGSSKYRGVTLHKCGRWEA  
RMGQFLGKKYIYLGLFDSEVEAARAYDKAAIKCNGREAVTNFEPSTYEGETISDPRSEGS  
QQNLDLNLGI

>S1-AP2d

VKKSRRGPRSRSSQYRGVTFYRRTGRWESH IWDCGKQVYLGGFDTAHTAARAYDRAAIKF  
RGVDADINFNLSYEDDMKQMKNLKKEEFVHVLRRQSTGFSRGSSKYRGVTLHKCGRWEA  
RMGQFLGKKYIYLGLFDSEVEAARAYDKAAIKCNGREAVTNFEPSSAYEGETINSNPQSEGS  
QQDLDLNLGI

>Prupe.6G091100.1.p

VKKSRRGPRSRSSQYRGVTFYRRTGRWESH IWDCGKQVYLGGFDTAHTAARAYDRAAIKF  
RGVDADINYNLSYEDDLKQMKNLTKKEEFVHILRRQSTGFSRGSSRYRGVTLHKCGRWEA  
RMGQFLGKKYIYLGLFDSEVEAARAYDKAAIKCNGREAVTNFEPSTYEGEMISEAGNEDG  
DHNLDLNLGI

>GSVIVT01025100001

VKKSRRGPRSRSSQYRGVTFYRRTGRWESH IWDCGKQVYLGGFDTAHTAARAYDRAAIKF  
RGVDADINFNLSYEDDLKQMKNLTKKEEFVHILRRQSTGFSRGSSKYRGVTLHKCGRWEA  
RMGQFLGKKYIYLGLFDSEVEAARAYDKAAIKCNGREAVTNFEPSTYEGEMIPASNEGS  
DHNLDLNLGI

>Medtr2g093060.1

AKKSRRGPRSRSSQYRGVTFYRRTGRWESH IWDCGKQVYLGGFDTAHTAARAYDRAAIKF  
RGLDADINFNLSYEDDMQMKNLKKEEFVHILRRHSNGFSRGSSKYRGVTLHKCGRWEA  
RMGQLLGKKYIYLGLFDSEVEAARAYDKAALKCNGREAVTNFEPSTYENEMKPGAINEGG  
SHNLDLNLGM

>Medtr4g061200.2

VKKSRRGPRSRSSQYRGVTFYRRTGRWESH IWDCGKQVYLGGFDTAHTAARAYDRAAIKF  
RGVGADINFNLSYEDDLKQTKNLSKEEFVQILRRQSNNGFSRGSSKYRGVTLHKCGRWEA  
RMGQFLGKKYIYLGLFDSEVEAARAYDKAAIQNNGREAMTNFEASTYEGEMKSAINEGG  
SQNLDLNLGI

>At-TOE1

VKKSRRGPRSRSSQYRGVTFYRRTGRWESH IWDCGKQVYLGGFDTAHTAARAYDRAAIKF  
RGVDADINFTLGDYEDMKQVQNLKKEEFVHILRRQSTGFSRGSSKYRGVTLHKCGRWEA  
RMGQFLGKKYIYLGLFDSEVEAARAYDKAAINTNGREAVTNFEMSSYQNEINSESNSEI  
DLNLGI

>Carubv10025387m

VKKSRRGPRSRSSQYRGVTFYRRTGRWESH IWDCGKQVYLGGFDTAHTAARAYDRAAIKF  
RGVDADINFTLGDYEDMKQVQNLKKEEFVHILRRQSTGFSRGSSKYRGVTLHKCGRWEA  
RMGQFLGKKYIYLGLFDSEVEAARAYDKAAINTNGREAVTNFEMSSYQNEINSETNNEGG  
HDKLDLNLGM

>Ph-BEN

VKKSRRGPRSRSSQYRGVTFYRRTGRWESH IWDCGKQVYLGGFDTAHTAARAYDRAAIKF  
RGLDADINFNLSYEDDLKQMTNFTKKEEFVHILRRQSTGFSRGSSQYRGVTLHKCGRWES  
RMGQFLGKKYIYLGLFDSEIEAARAYYKAAIKCNGREAVTNFELSTYEGELSTEADNGGA  
SHNLDLNLGI

>Solyc09g007260.2.1

VKKSRRGPRSRSSQYRGVTFYRRTGRWESH IWDCGKQVYLGGFDTAHTAARAYDRAAIKF  
RGLDADINFNLSYEDDLKQMGNFSKEEFVHILRRQSTGFSRGSSKYRGVTLHKCGRWEA  
RMGQFLGKKAYDKAAIKCNGKEAVTNFELSTYEGELSTEANGGADHNLDLNLGI

>Ph-BOB

IKKSRRGPRSRSSQYRGVTFYRRTGRWESHIDWCGKQVYLGGFDTAHAARAYDRAAIKF  
RGLDADINFNVSDYEEDLKQMNFSKEEFVHILRRQSTGFSRGSSKFRGVTLHKCGRWEA  
RMGQLLGKKYIYLGFLDSEIEAARAYDKAAIKSNGREAVTNFELSTYEGVLSSETADIGG  
TSHNLDLRLGI

>Solyc10g084340.1.1

KKSRRGPRSRSSQYRGVTFYRRTGRWESHIDWCGKQVYLGGFDTAHAARAYDRAAIKFR  
GLDADINFNISDYEDLKQMNFSKEEFVHILRRQSTGFSRGSSKYRGVTLHKCGRWEAR  
MGQLLGKKYIYLGFLDNEIEAARAYDKAAIKCNGREAVTNFEPNTYEEALSSEADTGGTD  
HNIDLNLGI

>Medtr7g100590.1

VKKSRRGPRSRSSQYRGVTFYRRTGRWESHIDWCGKQVYLGGFDTAHAARAYDRAAIKF  
RGVDADINFNVSDYDEDIKQMNFTKEEFVHILRRQSTGFSRGSSKYRGVTLHKCGRWEA  
RMGQFLGKKYIYLGFLDSELDAAARAYDKAAIKCNGREAVTNFEASSYEGELTSQADNDDI  
KQNLDLNLGI

>Prupe.6G242400.1.p

VKKSRRGPRSRSSQYRGVTFYRRTGRWESHIDWCGKQVYLGGFDTAHAARAYDRAAIKF  
RGTEADINFNVSDYEDDIKQMSNFTKEEFVHILRRQSTGFSRGSSKYRGVTLHKCGRWEA  
RMGQFLGKKYIYLGFLDSEIEAARAYDKAAIKCNGREAVTNFEPNSYDQIMSEAHNGGS  
DKSLDLNLGI

>GSVIVT01025548001

VKKSRRGPRSRSSQYRGVTFYRRTGRWESHIDWCGKQVYLGGFDTAHAARAYDRAAIKF  
RGADADINFAVSDYDEDIKQMSNFTKEEFVHILRRQSTGFSRGSSKYRGVTLHKCGRWEA  
RMGQFLGKKYIYLGFLDSEIEAARAYDKAAIKCNGREAVTNFEPSTYEGEIIIFPADNGGS  
SQNLNLLPNLDDLHLGV

>Ph-ROB1

MKKSRRGPRSRSSQYRGVTFYRRTGRWESHIDWCGKQVYLGGFDTAHAARAYDRAAIKF  
RGVEADINFNLEDYEGDLKQMTNLTKEEFVHILRRQSTGFPRGSSKYRGVTLHKCGRWEA  
RMGQFLGKKYVYLGFLDTEVEAARAYDKAAIKCNGKDAVTNFDPSIYENELNSTESTDGS  
ADHNLDSLGG

>S1-AP2c

IKKSRRGPRSRSSQYRGVTFYRRTGRWESHIDWCGKQVYLGGFDTAHAARAYDRAAIKF  
RGVEADINFNLEDYEDLKQMTSLTKEEFVHILRRQSTGFPRGSSKYRGVTLHKCGRWEA  
RMGQFLGKKYVYLGFLDTEIEAARAYDKAAIKCNGKDAVTNFDPSIYENELNSIESTDNV  
ADHNLDSLGG

>Ph-ROB2

VKKSRRGPRSRSSQYRGVTFYRRTGRWESHIDWCGKQVYLGGFDTAHAARAYDRAAIKF  
RGVEADINFNLEDYEDLKQMTNLTKEEFVHILRRQSTGFPRGSSKYRGVTLHKCGRWEA  
RMGQFLGKKYVYLGFLDTEVEAARAYDKAAIKCNGKDAVTNFDPSIYENELNTEFTDNA  
ADHNLDSLGS

>S1-AP2a

IKKSRRGPRSRSSQYRGVTFYRRTGRWESHIDWCGKQVYLGGFDTAHAARAYDRAAIKF  
RGAADINFNLEDYEDLKQMSNLTKEEFVHILRRQSTGFPRGSSKYRGVTLHKCGRWEA  
RMGQFLGKKYVYLGFLDTEVEAARAYDKAAIKCNGKDAVTNFDPSIYENELNSTECTDNA  
TDHNLDSLGG

>Ph-ROB3

MKKSRRGPRSRSSQYRGVTFYRRTGRWESHIDWCGKQVYLGGFDTAHAARAYDRAAIKF  
RGVEADINFNLEDYEDLKQMRNLTKEEFVHILRRQSTGFPRGSSKYRGVTLHKCGRWEA  
RMGQLLGKKYVYLGFLDTEVEAARAYDKAAIKCNGKDAVTNFDSSIYGNELNLTSTHKA  
LDHSLDSLGG

>S1-AP2b

MKKSRRGPRSRSSQYRGVTFYRRTGRWESHIDWCGKQVYLGGFDTAHAARAYDRAAIKF  
RGMEADINFNLEDYEDLKQMNLTKEEFVHILRRQSTGFPRGSSKYRGVTLHKCGRWEA  
RMGQLLGKKYVYLGFLDTEVEAARAYDKAAIKCNGKDAVTNFDPCIYENELNSSECSNKA  
ADHSLDSLGS

>GSVIVT01022081001

LKKSRRGPRSRSSQYRGVTFYRRTGRWESHIDWCGKQVYLGGFDTAHAARAYDRAAIKF  
RGVEADINFNLEDYEDLKQMGNLTKEEFVHILRRQSTGFPRGSSKYRGVTLHKCGRWEA  
RMGQFLGKKYVYLGFLDTEIEAARAYDKAAIKCNGKEAVTNFDPSIYENELNSSGNAADH

NLDLSLGG

>Medtr5g016810.1

MKKSRRGPRSRSSQYRGVTFYRRTGRWESH IWDCGKQVYLGGFDTA HAAARAYDRAAIKF  
RGVEADINFNIEDYEEDLKQMSNLTKEEFVHVLRRQSTGFPRGSSKYRGVTLHKCGRWEA  
RMGQFLGKKYVYLG LFDTEIEAARAYDKAAIKCNGKEAVTNFDPSIYDNELNSESSGNA  
DHNLDLSLGN

>Prupe.6G231700.1.p

MKKSRRGPRSRSSQYRGVTFYRRTGRWESH IWDCGKQVYLGGFDTA HAAARAYDRAAIKF  
RGVEADINFSIEDYEEDLKQMTNLTKEEFVHVLRRQSTGFPRGSSKYRGVTLHKCGRWEA  
RMGQFLGKKYVYLG LFDTEIDAARAYDKAAIKCNGKEAVTNFDPSIYENELNPSSSESSGV  
NAAEHNLDLSLGS

>RcHm2g0106221

MKKSRRGPRSRSSQYRGVTFYRRTGRWESH IWDCGKQVYLGGFDTA HAAARAYDRAAIKF  
RGVEADINFNIDDYEEDLKQMSNLTKEEFVHVLRRQSTGFPRGSSKYRGVTLHKCGRWEA  
RMGQFLGKKYVYLG LFDTEIDAARAYDKAAIKCNGKEAVTNFDPSIYESELNSTEPSSIN  
AGDHNLDLSLGN

>Fv-gene23806-v1.0-ab\_initio

MKKSRRGPRSRSSQYRGVTFYRRTGRWESH IWDCGKQVYLGGFDTA HAAARAYDRAAIKF  
RGVEADINFNIEDYEEDLKQMSNLTKEEFVHVLRRQSTGFPRGSSKYRGVTLHKCGRWEA  
RMGQFLGKKYVYLG LFDTEIDAARAYDKAAIKCNGKEAVTNFDPSIYESELNTTEPASGN  
NNAADHNLDLSLGN

>Medtr4g094868.1

MKKSRRGPRSRSSQYRGVTFYRRTGRWESH IWDCGKQVYLGGFDTA HAAARAYDRAAIKF  
RGVEADINFNIEDYEEDLKQMTNLTKEEFVHVLRRQSTGFPRGSSKYRGVTLHKCGRWEA  
RMGQFLGKKYVYLG LFDTEVEAARAYDKAAIKCNGKEAVTNFDPSIYDSELNNSDPASNA  
GDHNLDLSLGN

>At-AP2

LKKSRRGPRSRSSQYRGVTFYRRTGRWESH IWDCGKQVYLGGFDTA HAAARAYDRAAIKF  
RGVEADINFNIDDDYDDLKQMTNLTKEEFVHVLRRQSTGFPRGSSKYRGVTLHKCGRWEA  
RMGQFLGKKYVYLG LFDTEVEAARAYDKAAIKCNGKDAVTNFDPSIYDEELNAESSGNPT  
TPQDHNLDLSLGN

>Carubv10004818m

LKKSRRGPRSRSSQYRGVTFYRRTGRWESH IWDCGKQVYLGGFDTA HAAARAYDRAAIKF  
RGVEADINFNIEDYDDLKQMTNLTKEEFVHVLRRQSTGFPRGSSKYRGVTLHKCGRWEA  
RMGQFLGKKYVYLG LFDTEVEAARAYDKAAIKCNGKDAVTNFDPSIYDEELNAESSGNHP  
TPQDHNLDLSLGN

>At-TOE3

IKKSRRGPRSRSSQYRGVTFYRRTGRWESH IWDCGKQVYLGGFDTA HAAARAYDRAAIKF  
RGVDADINFDIEDYDDLKQMGNTLKEEFMHVLRQSTGFPRGSSKYRGVTLHKCGRWES  
RLGQFLNKKYVYLG LFDTEIEAARAYDKAAIKCNGKDAVTNFDPKVYEEEEEDLSSETTRN  
GHNLGSLGE

>Carubv10026667m

LKKSRRGPRSRSSQYRGVTFYRRTGRWESH IWDCGKQVYLGGFDTA HAAARAYDRAAIKF  
RGADADINFDIEDYDDLKQMGNTLKEEFMHVLRQSTGFPRGSSKYRGVTLHKCGRWES  
RLGQFLNKKYVYLG LFDTEIEAARAYDKAAIKCNGKDAVTNFDPKVYEEEEEDLIPEMKWNG  
HNLDLSLGE

>RcHm5g0061501

VKKSRRGPRSRSSQYRGVTFYRRTGRWESH IWDCGKQVYVGGFDTA HAAARAYDRAAIKF  
RGVDADINYNLSDYEEDMKQMKNTLKEEFVHILRRQSTGFSRGSSRYRGVTLHKCGRWEA  
RMGQFLGKKYIYLG LFDSEVEAARAYDKAAIKCNGREAVTNFEASTYEGEMISDAVNEDG  
NHNLDLNLGI

>Fv-gene25362-v1.0-ab\_initio

VKKSRRGPRSRSSQYRGVTFYRRTGRWESH IWDCGKQVYLGGFDTA HAAARAYDRAAIKF  
RGVDADINYNLSDYEEDMKQMKNTLKEEFVHILRRQSTGFSRGSSKYRGVTLHKCGRWEA  
RMGQFLGKKYIYLG LFDSEVEAARAYDKAAIKCNGREAVTNFEASTYEGEMISDAGNEDG  
NHNLDLNLGI

>RcHm3g0468481

VKKSRRGPRSRSSQYRGVTFYRRTGRWESH IWDCGKQVYLGGFDTA HSAARAYDRAAIKF



RGTEADINFNVSDYDEDIKQMSKFTKEEFVHILRRQSTGFARGSSKYRGVTLHKCGRWEA  
RMGQLLGKKYIYLGLFDSEIEAARAYDQAAIKCHGREAVTNFNPSLYDGEIMAEANNAGI  
DSDLNLGI

>Rcht\_S350.36

VKKSRRGPRSRSSQYRGVTFYRRTGRWESHIDWNGKQVYLGGFDTAHSAAARAYDRAAIKF  
RGTEADINFNVSDYDEDIKQMSKFTKEEFVHILRRQSTGFARGSSKYRGVTLHKCGRWEA  
RMGQLLGKKYIYLGLFDSEIEAARAYDQAAIKCHGREAVTNFNPSLYDGEIMAEANNAGI  
DSDLNLGI

>Fv-gene18070-v1.0-ab\_initio

VKKSRRGPRSRSSQYRGVTFYRRTGRWESHIDWNGKQVYLGGFDTAHSAAARAYDRAAIKF  
RGTEADINFVSGDYDEDIKQMSNYTKKEEFVQILRRQSTGFARGSSKYRGVTLHKCGRWEA  
RMGQLLGKKYIYLGLFDTEIEAARAYDQAAIKCHGSEAVTNFNPILYDGEIEAEPNAGM  
DGSDDLNLGI

>Ph-ANT1

HRKSIDTFGQRTSQYRGVTRHRWTGRYEAHLWDNSCKKEGQSRKGRQVYLGGYDMEEKAA  
RAYDLAALKYWGPSTHINFPLENYQKELEDMNMTRQEYVAHLRRKSSGFSRGASMYRGV  
TRHHQHGRWQARI GRVAGNKDLYLGTGFSTQEEAAEAYDVAAIKFRGANAVTNFDMSRYEV  
ERIMASNTLLSGELARRKKDT

>Ph-ANT2

HRKSIDTFGQRTSQYRGVTRHRWTGRYEAHLWDNSCKKEGQTRKGRQVYLGGYDMEEKAA  
RAYDLAALKYWGPSTHINFPLENYQKELEEMKNMTRQEYVAHLRRKSSGFSRGASMYRGV  
TRHHQHGRWQARI GRVAGNKDLYLGTGFSTQEEAAEAYDVAAIKFRGVNAVTFDISRYDV  
EKIMASNTLPAGEFARRTKER

>At-ANT

HRKSIDTFGQRTSQYRGVTRHRWTGRYEAHLWDNSFKKEGHSRKGRQVYLGGYDMEEKAA  
RAYDLAALKYWGPSTHTNFSAENYQKEIEDMKNMTRQEYVAHLRRKSSGFSRGASIYRGV  
TRHHQHGRWQARI GRVAGNKDLYLGTFGTQEEAAEAYDVAAIKFRGTNAVTFDITRYDV  
DRIMSSNTLLSGELARRNNNS
